# Supplementary material for: Quantity and Quality of Sleep and Incidence of Type 2 Diabetes: A systematic review and meta-analysis
Source: PubMed Central journal article supplement — Diabetes Care. 2009 Nov 12;33(2):414–20. doi: 10.2337/dc09-1124 (PMC2809295; doi:10.2337/dc09-1124), 2009-11-12
Supplement: supp_dc09-1124_dc09-1124_Online_appendix.pdf [file supp_dc09-1124_dc09-1124_Online_appendix.pdf]

**Appendix 1.** Flowchart indicating the results of the systematic review with inclusions and exclusions

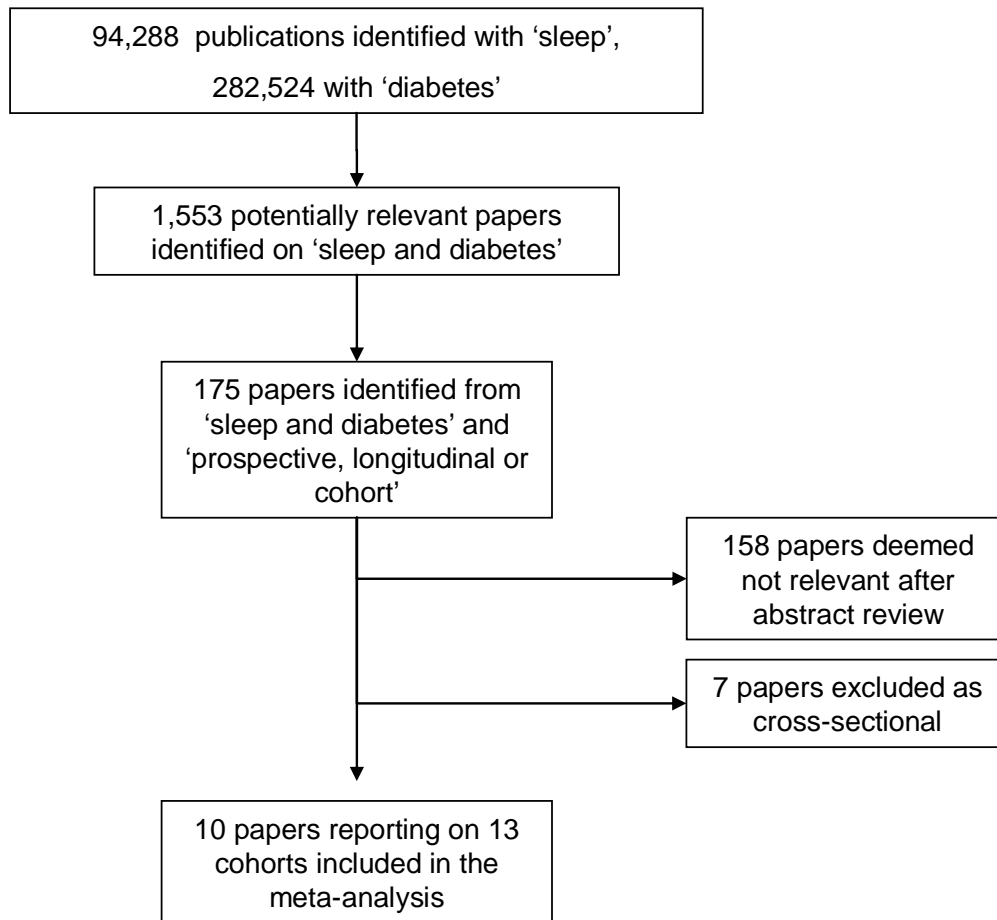

**Appendix 2:**

(a) Funnel plot of the risk type-2 diabetes associated with *short duration* of sleep (Egger's test:  $p=0.14$ )

(b) Funnel plot of the risk type-2 diabetes associated with *long duration* of sleep (Egger's test:  $p=0.42$ )

(c) Funnel plot of the risk type-2 diabetes associated with *difficulty in initiating* sleep (Egger's test:  $p=0.37$ )

(d) Funnel plot of the risk type-2 diabetes associated with *difficulty in maintaining* sleep (Egger's test:  $p=0.15$ )

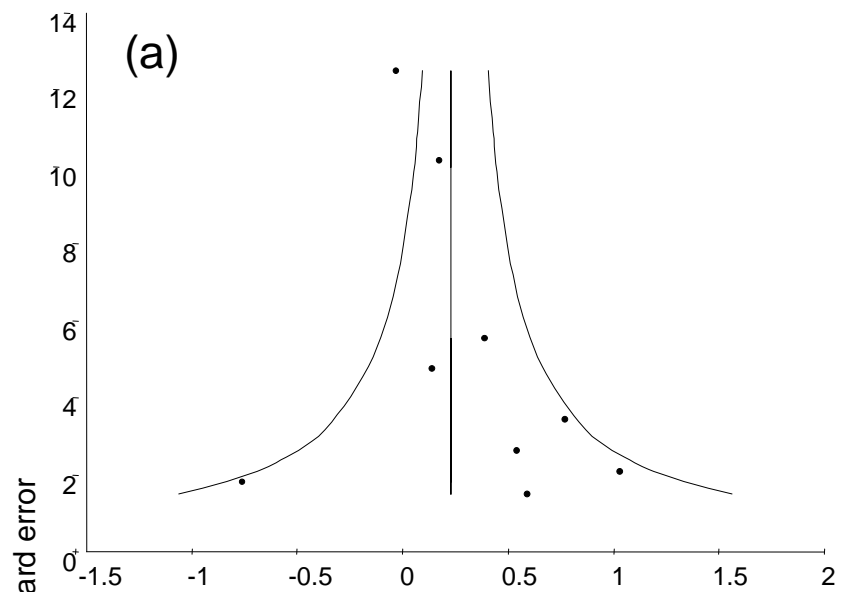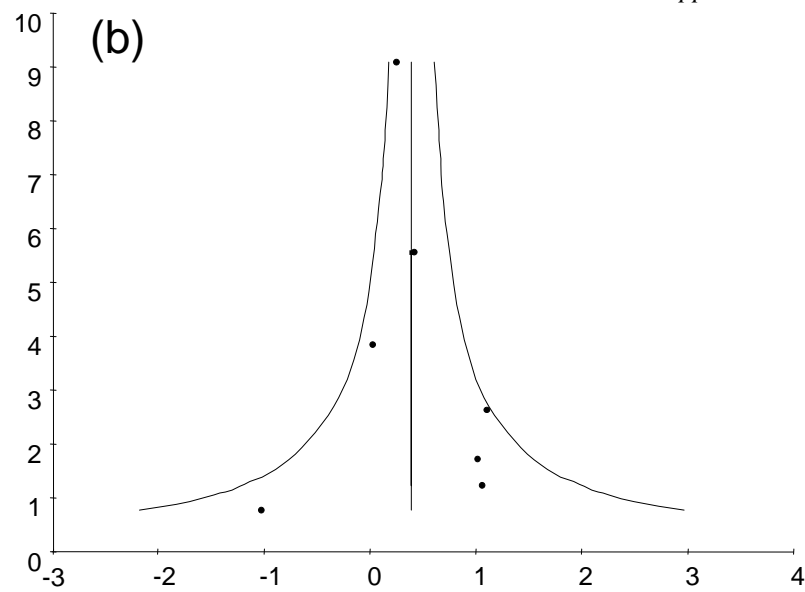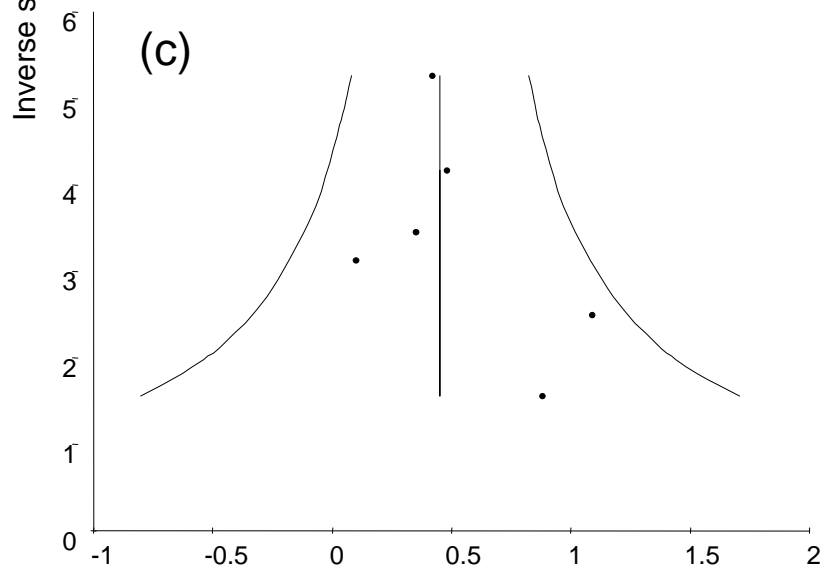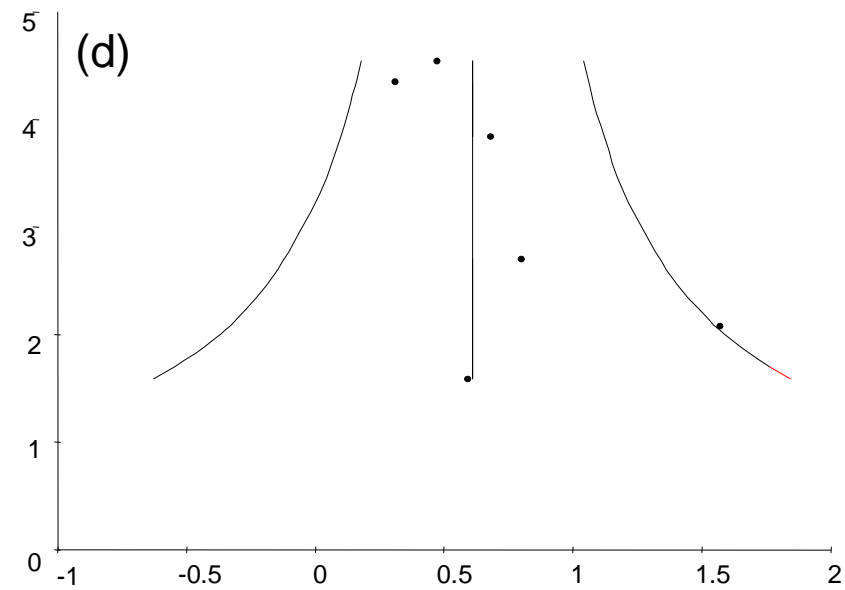

Ln RR
